# Supplementary material for: Targeting HIV-1 reservoirs in T cell subsets
Source: Frontiers journal article supplement (doi:10.3389/fimmu.2023.1087923), 2023-01-20
Supplement: Data_Sheet_1.PDF [file Data_Sheet_1.PDF]

**A**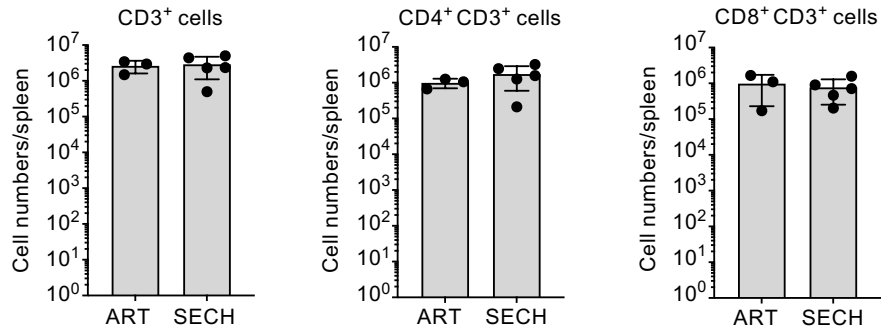**B**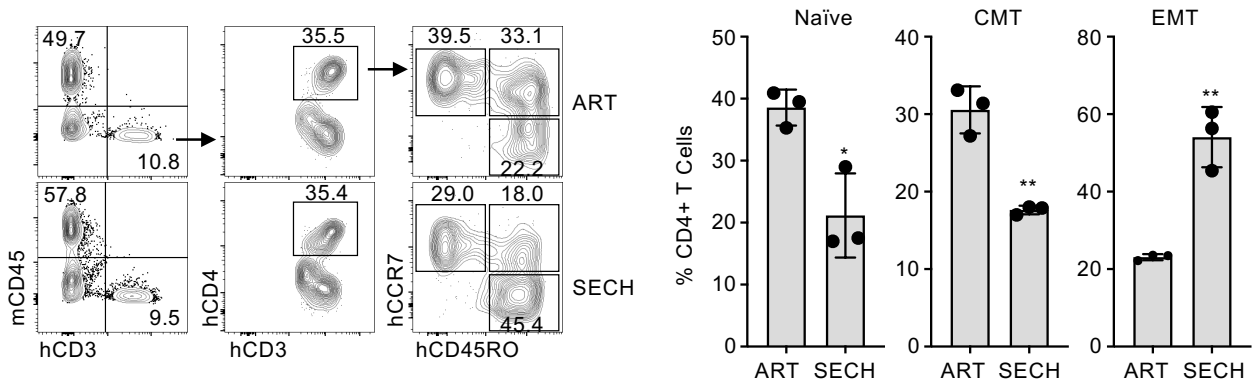**C**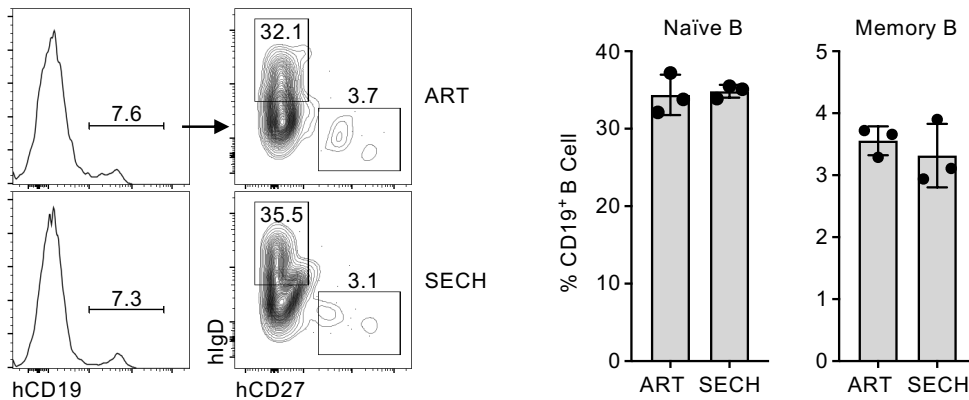

**Supplementary Figure 1 | Human T cell subsets in HIV-1-infected Hu-HSC mice after SECH treatments.** (A) HIV-1-infected Hu-HSC mice were treated by SECH (n=3) or ART alone (n=3). The human immune cells from the spleen were determined and quantified by flow cytometry after withdrawal of treatments. (B) Human CD4<sup>+</sup> T cell subsets from ART- or SECH-treated mice, including CCR7<sup>+</sup>CCD45RO<sup>-</sup> naïve cells, CCR7<sup>+</sup>CCD45RO<sup>+</sup> CMT and CCR7<sup>-</sup>CCD45RO<sup>+</sup> EMT, were quantified by flow cytometry analyses. (C) Human CD19<sup>+</sup>IgD<sup>+</sup>CD27<sup>-</sup> naïve B cells and CD19<sup>+</sup>IgD<sup>-</sup>CD27<sup>+</sup> memory B cells from ART- or SECH-treated mice were quantified after withdrawal of treatments. Data are presented as mean ± SD. \*  $P < 0.05$  and \*\*  $P < 0.01$ .

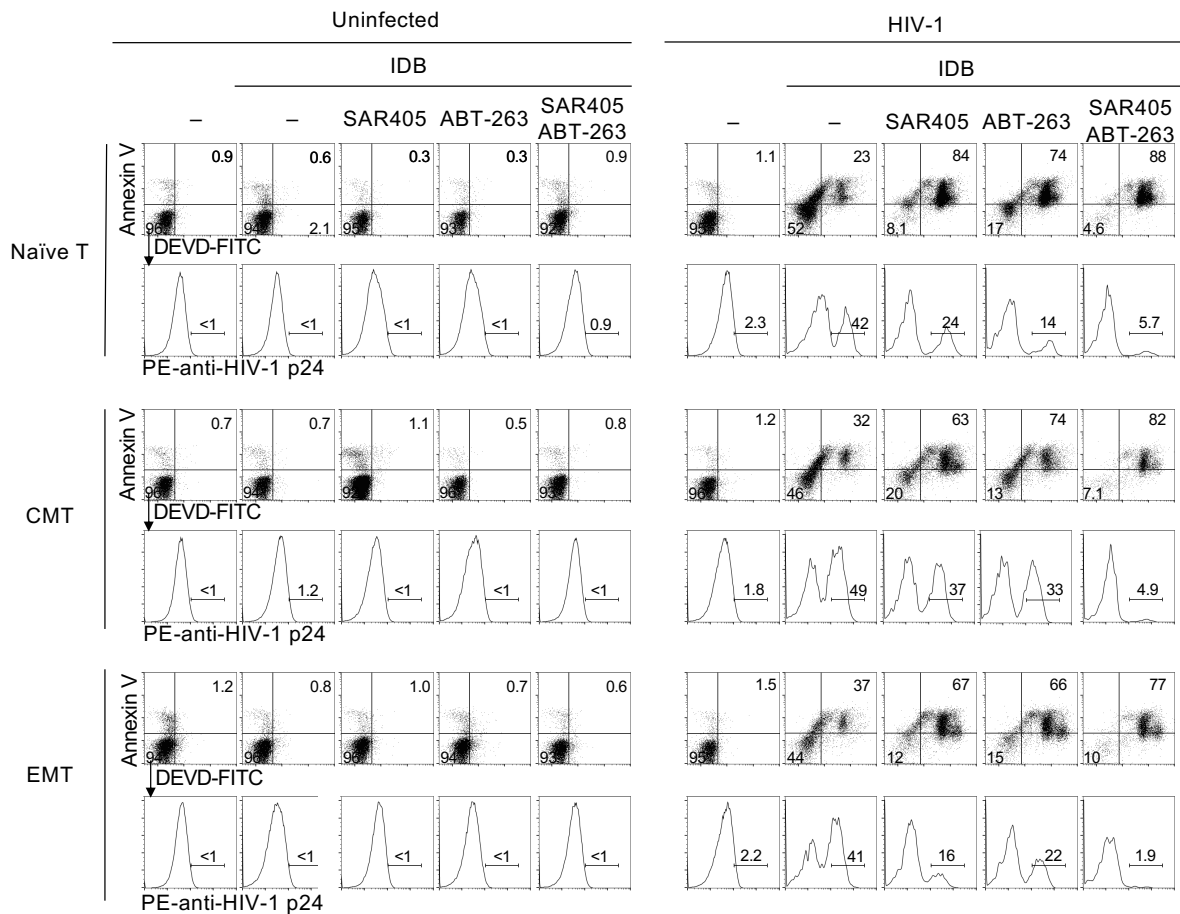

**Supplementary Figure 2 |** Naïve, central memory (CMT) and effector memory T cells (EMT) were sorted from human PBMCs by flow cytometry. The cells were infected with HIV-1 NL4-3 (1 MOI), followed by culture for 4 days to establish latent infections. Latently infected cells were stimulated with 0.1  $\mu$ M IDB. ABT-263 (0.2 mM) and SAR405 (2 mM) were added as indicated. The cells were cultured for 48 h, followed by incubation with DEVD-FITC, staining with APC-Annexin V and intracellular staining with PE-anti-HIV p24.
